# Supplementary material for: AuCu bimetallic nanocluster-modified titania nanotubes for photoelectrochemical water splitting: composition-dependent atomic arrangement and activity
Source: Royal Society of Chemistry journal article supplement (doi:10.1039/d4nr03219e), 2024-11-14
Supplement: d4nr03219e1.pdf [file d4nr03219e1.pdf]

## Supplementary information

### **AuCu bimetallic nanocluster-modified titania nanotubes for photoelectrochemical water splitting: composition-dependent atomic arrangement and activity**

Vana Chinnappa Chinnabathini<sup>a,b</sup>, Karthick Raj Ag<sup>b</sup>, Thi Hong Trang Nguyen<sup>a</sup>, Zviadi Zarkua<sup>a</sup>, Imran Abbas<sup>a</sup>, Thi Hang Hoang<sup>a</sup>, Peter Lievens<sup>a</sup>, Didier Grandjean<sup>a\*</sup>, Sammy W. Verbruggen<sup>b\*</sup>, Ewald Janssens<sup>a\*</sup>

---

<sup>a</sup> *Quantum Solid-State Physics, Department of Physics and Astronomy, KU Leuven, Belgium*

<sup>b</sup> *Sustainable Energy, Air & Water Technology (DuEL), University of Antwerp, Belgium*

---

Email to: [ewald.janssens@kuleuven.be](mailto:ewald.janssens@kuleuven.be), [didier.grandjean@kuleuven.be](mailto:didier.grandjean@kuleuven.be), [sammy.verbruggen@uantwerpen.be](mailto:sammy.verbruggen@uantwerpen.be)

#### **Contents:**

- Supplementary tables with details of the EXAFS refinements (Tables S1 and S2)
- Size distributions of the NCs (Figure S1)
- XRD patterns of the Au<sub>x</sub>Cu<sub>1-x</sub>/TNT samples (Figure S2)
- EDX elemental mapping Au<sub>0.25</sub>Cu<sub>0.75</sub>/TNT (Figure S3)
- XPS survey spectra (Figure S4)
- Chronoamperometry of Au<sub>0.25</sub>Cu<sub>0.75</sub>/TNT (Figure S5)
- PEC of Au<sub>0.25</sub>Cu<sub>0.75</sub> NCs/TNT for different NC loadings (Figure S6)
- EXAFS characterization of the Au<sub>x</sub>Cu<sub>1-x</sub>/TNT samples (Figures S7 and S8)
- Assessment of the possible current generated by the oxidation of copper

## Supplementary Tables

**Table S1.** Summary of structural results of Au L<sub>3</sub>-edge EXAFS refinements of Au<sub>x</sub>Cu<sub>1-x</sub>/TNT (x = 0.75, 0.5, 0.25).

| shell | Au <sub>0.75</sub> Cu <sub>0.25</sub>         |          |                     | Au <sub>0.5</sub> Cu <sub>0.5</sub>           |          |                     | Au <sub>0.25</sub> Cu <sub>0.75</sub>         |         |                     |
|-------|-----------------------------------------------|----------|---------------------|-----------------------------------------------|----------|---------------------|-----------------------------------------------|---------|---------------------|
|       | N                                             | R (Å)    | A (Å <sup>2</sup> ) | N                                             | R (Å)    | A (Å <sup>2</sup> ) | N                                             | R (Å)   | A (Å <sup>2</sup> ) |
| Au-Au | 10.8(6)                                       | 2.850(7) | 0.020(1)            | 11.4(7)                                       | 2.844(7) | 0.022(1)            | 5.5(3)                                        | 2.81(1) | 0.023(2)            |
| Au-Cu | 0.6(1)                                        | 2.64(3)  | 0.03(2)             | -                                             | -        | -                   | 5.5(5)                                        | 2.66(1) | 0.024(2)            |
|       | R factor = 42%<br>E <sub>F</sub> = -7.9(9) eV |          |                     | R factor = 38%<br>E <sub>F</sub> = -7.9(9) eV |          |                     | R factor = 37%<br>E <sub>F</sub> = -7.6(9) eV |         |                     |

**N** = coordination number

**R** = radial distance

**A** = Debye-Waller term ( $A=2\sigma^2$  with  $\sigma$  the Debye-Waller factor)

**E<sub>F</sub>** = Contribution of the wave vector of the zero-photoelectron relative to origin of k

**Table S2.** Summary of structural results of Cu K-edge EXAFS refinements of Au<sub>x</sub>Cu<sub>1-x</sub>/TNT (x = 0.75, 0.5, 0.25, 0).

| shell | Au <sub>0.75</sub> Cu <sub>0.25</sub>        |         |                     | Au <sub>0.5</sub> Cu <sub>0.5</sub>           |         |                     | Au <sub>0.25</sub> Cu <sub>0.75</sub>        |         |                     | Cu                                            |         |                     |
|-------|----------------------------------------------|---------|---------------------|-----------------------------------------------|---------|---------------------|----------------------------------------------|---------|---------------------|-----------------------------------------------|---------|---------------------|
|       | N                                            | R (Å)   | A (Å <sup>2</sup> ) | N                                             | R (Å)   | A (Å <sup>2</sup> ) | N                                            | R (Å)   | A (Å <sup>2</sup> ) | N                                             | R (Å)   | A (Å <sup>2</sup> ) |
| Cu-O  | 1.8(3)                                       | 1.93(2) | 0.013(6)            | 2.9(3)                                        | 1.96(1) | 0.009(2)            | 1.93(3)                                      | 1.94(2) | 0.019(5)            | 2.27(2)                                       | 1.93(1) | 0.016(2)            |
| Cu-Au | 1.9(6)                                       | 2.63(6) | 0.03(2)             | -                                             | -       | -                   | 4.56(9)                                      | 2.63(2) | 0.029(5)            | -                                             | -       | -                   |
| Cu-Cu | 2.3(6)                                       | 2.57(4) | 0.03(1)             | 1.5(5)                                        | 2.52(3) | 0.02(1)             | 1.16(3)                                      | 2.53(4) | 0.034(2)            | 3.1(6)                                        | 2.8(2)  | 0.023(6)            |
| Cu-Cu | 0.9(2)                                       | 2.70(4) | 0.011(7)            | 1.2(4)                                        | 2.70(3) | 0.009(5)            | 0.69(1)                                      | 2.78(5) | 0.042(3)            | 2.99(5)                                       | 3.17(3) | 0.028(9)            |
| Cu-Cu | 1.4(3)                                       | 2.84(4) | 0.02(1)             | 2.0(8)                                        | 2.89(6) | 0.027(2)            |                                              |         |                     | 2.91(8)                                       | 2.99(3) | 0.0181(6)           |
| Cu-Cu |                                              |         |                     | 3.3(6)                                        | 3.12(3) | 0.03(1)             |                                              |         |                     | 1.37(3)                                       | 2.56(3) | 0.028(9)            |
|       | R factor = 45%<br>E <sub>F</sub> = 3.8(9) eV |         |                     | R factor = 32%<br>E <sub>F</sub> = -1.9(9) eV |         |                     | R factor = 45%<br>E <sub>F</sub> = 6.6(9) eV |         |                     | R factor = 33%<br>E <sub>F</sub> = -9.5(9) eV |         |                     |

**N** = coordination number

**R** = radial distance

**A** = Debye-Waller term ( $A=2\sigma^2$  with  $\sigma$  the Debye-Waller factor)

**E<sub>F</sub>** = Contribution of the wave vector of the zero-photoelectron relative to origin of k

## Supplementary Figures

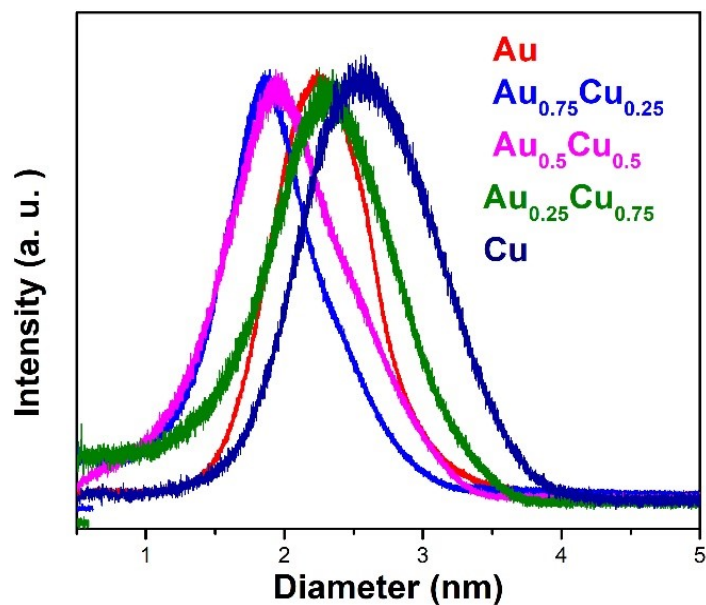

**Figure S1.** Size distributions of Au<sub>x</sub>Cu<sub>1-x</sub> ( $x = 1, 0.75, 0.5, 0.25,$  and  $0$ ) NCs as measured by time-of-flight mass spectrometry prior to cluster deposition. The size distributions are normalized to their highest intensity. The cluster diameter is deduced from the measured mass assuming a spherical shape and bulk density.

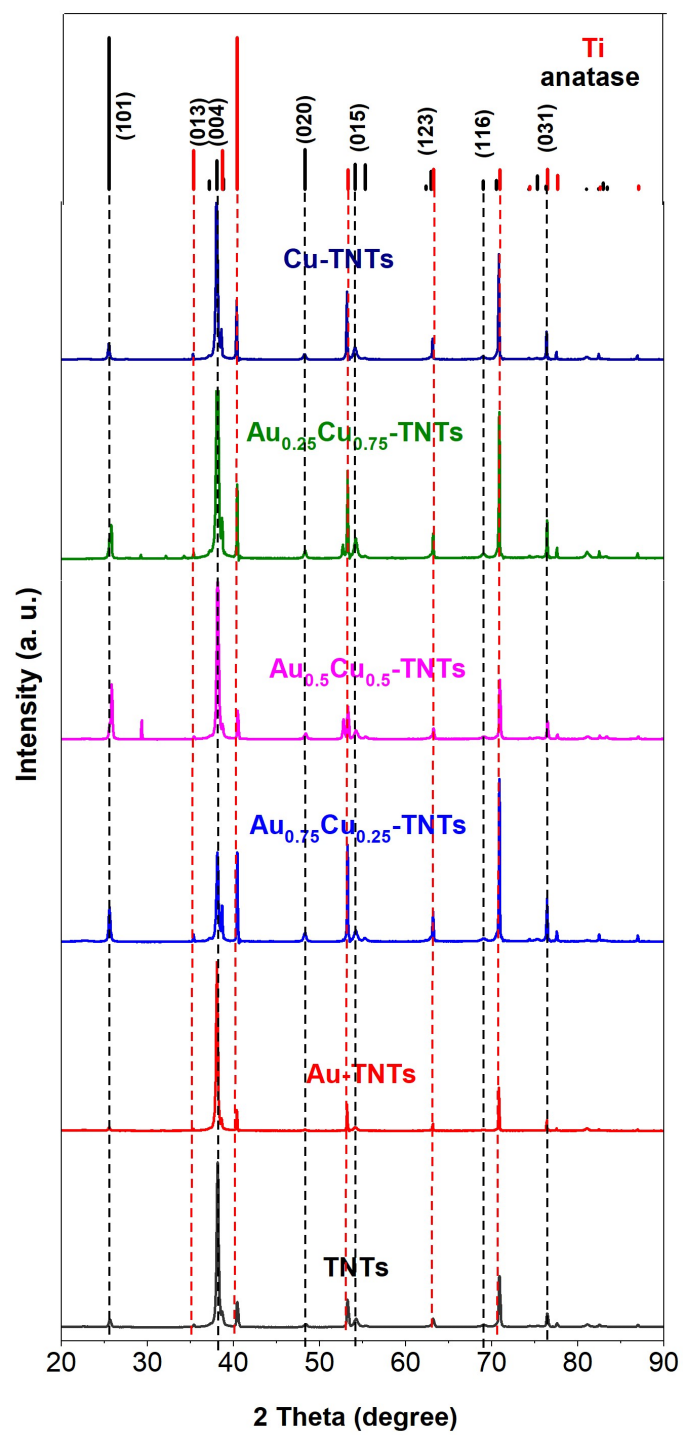

**Figure S2.** XRD patterns of pristine TNTs and Au<sub>x</sub>Cu<sub>1-x</sub> ( $x = 1, 0.75, 0.5, 0.25$  and  $0$ ) NC modified TNTs electrodes with NC loading of 4 ML.

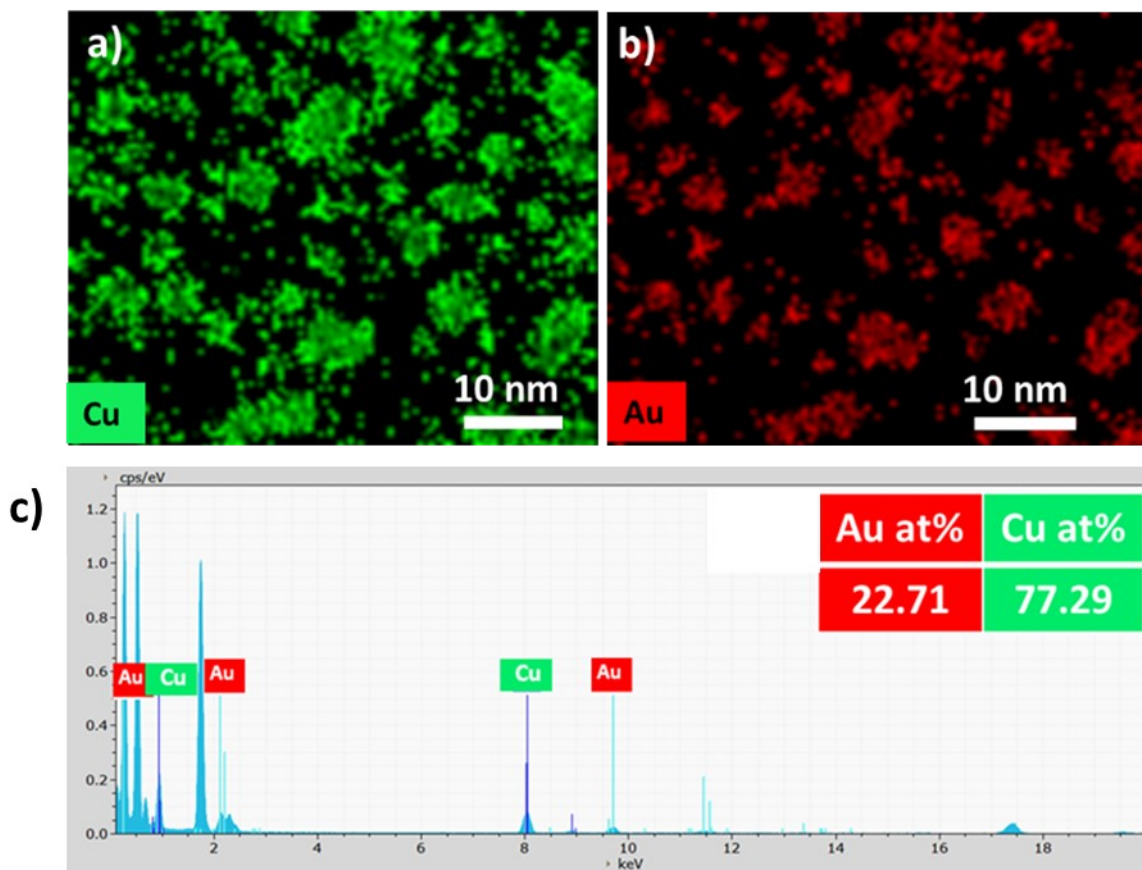

**Figure S3.** EDX elemental mapping the  $\text{Au}_{0.25}\text{Cu}_{0.75}$  /TNT electrode with a) Cu and b) Au (red). c) EDX patterns of the same sample.

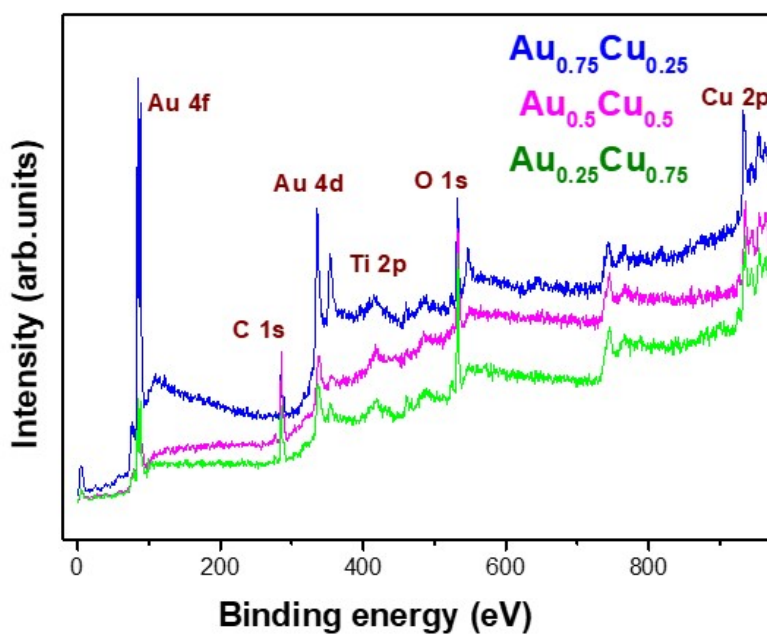

**Figure S4.** XPS survey spectra recorded for  $\text{Au}_x\text{Cu}_{1-x}$ /TNT with  $x = 0.75, 0.5,$  and  $0.25$ .

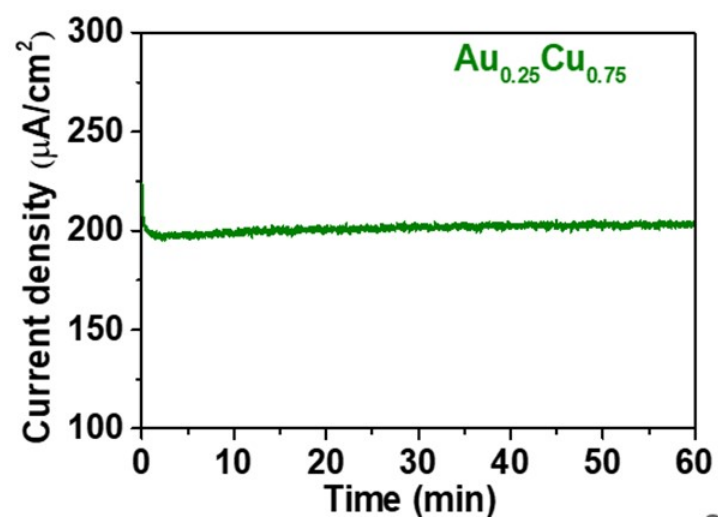

**Figure S5.** Time dependence of the current density of 4 ML Au<sub>0.25</sub>Cu<sub>0.75</sub> measured in 0.5 M Na<sub>2</sub>SO<sub>4</sub> without any scavengers.

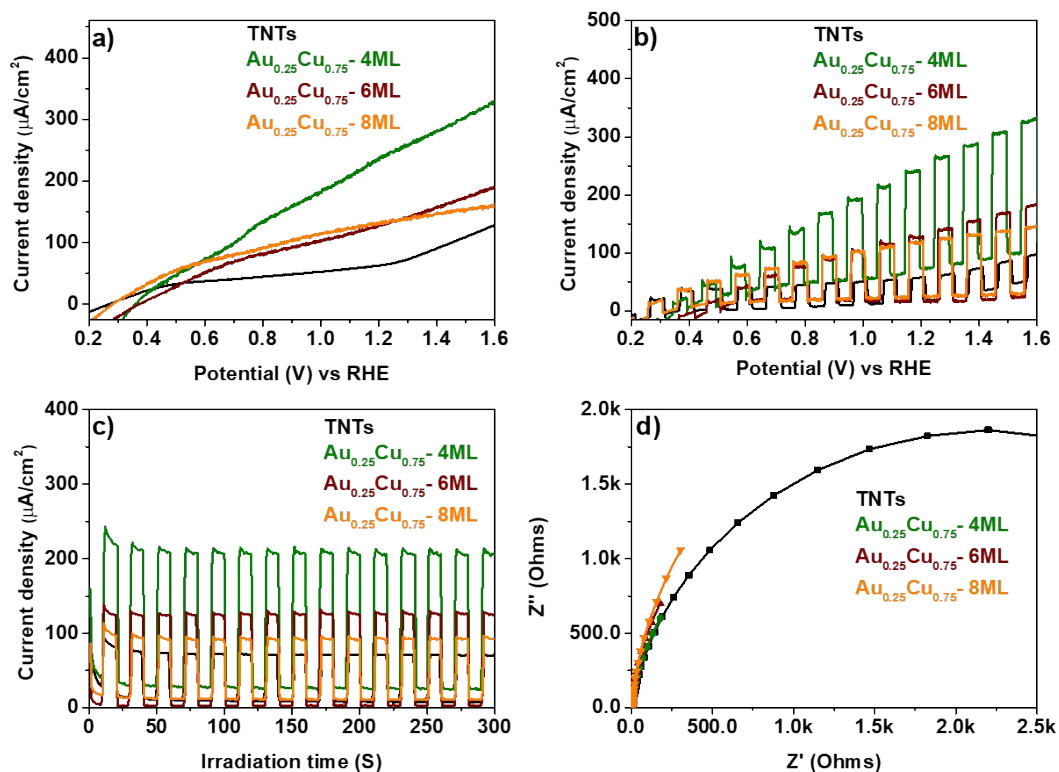

**Figure S6** a) LSV of Au<sub>0.25</sub>Cu<sub>0.75</sub> NCs/TNT with loadings of 4 ML, 6 ML and 8 ML and pristine TNTs electrodes tested under solar illumination (100 mW/cm<sup>2</sup>). b) LSV under chopped illumination (alternating on and off every 5 s). c) Chronoamperometry of Au<sub>0.25</sub>Cu<sub>0.75</sub> NCs/TNT at 1.2 V<sub>RHE</sub> in Na<sub>2</sub>SO<sub>4</sub> electrolyte at pH 7.2 with solar illumination. d) EIS of Au<sub>0.25</sub>Cu<sub>0.75</sub> NCs/TNT under solar illumination.

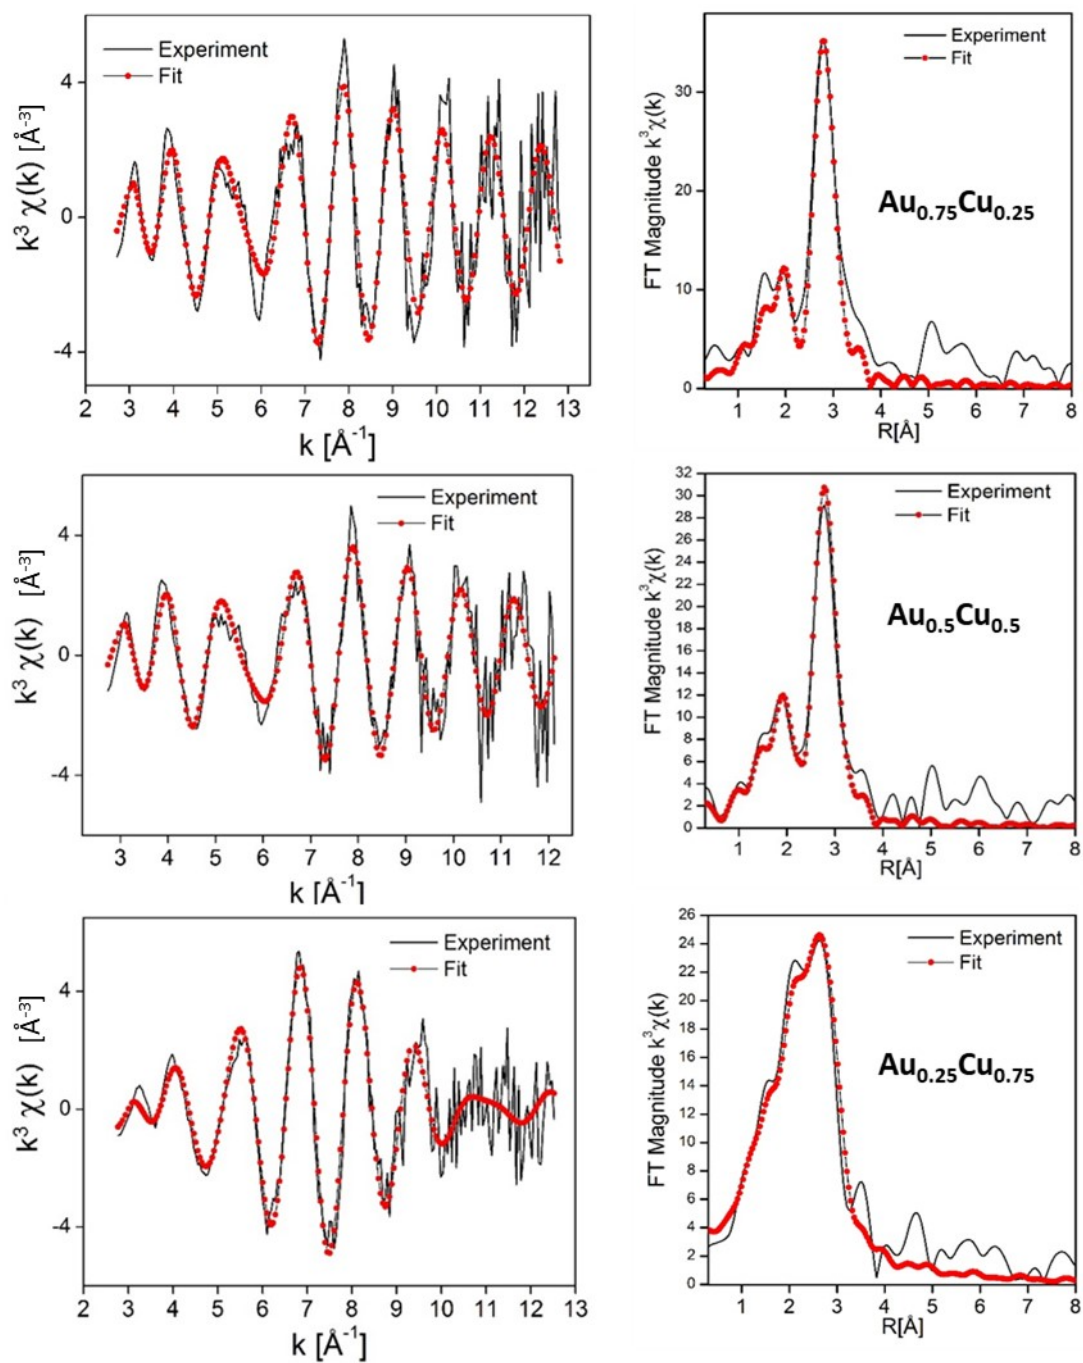

**Figure S7.** Fluorescence-detected Au  $L_3$ -edge  $k^3$ -weighted EXAFS of  $\text{Au}_x\text{Cu}_{1-x}$  ( $x = 0.75, 0.5,$  and  $0.25$ ) (left) with the corresponding phase corrected Fourier transforms (right). Fits of the data are given by red lines.



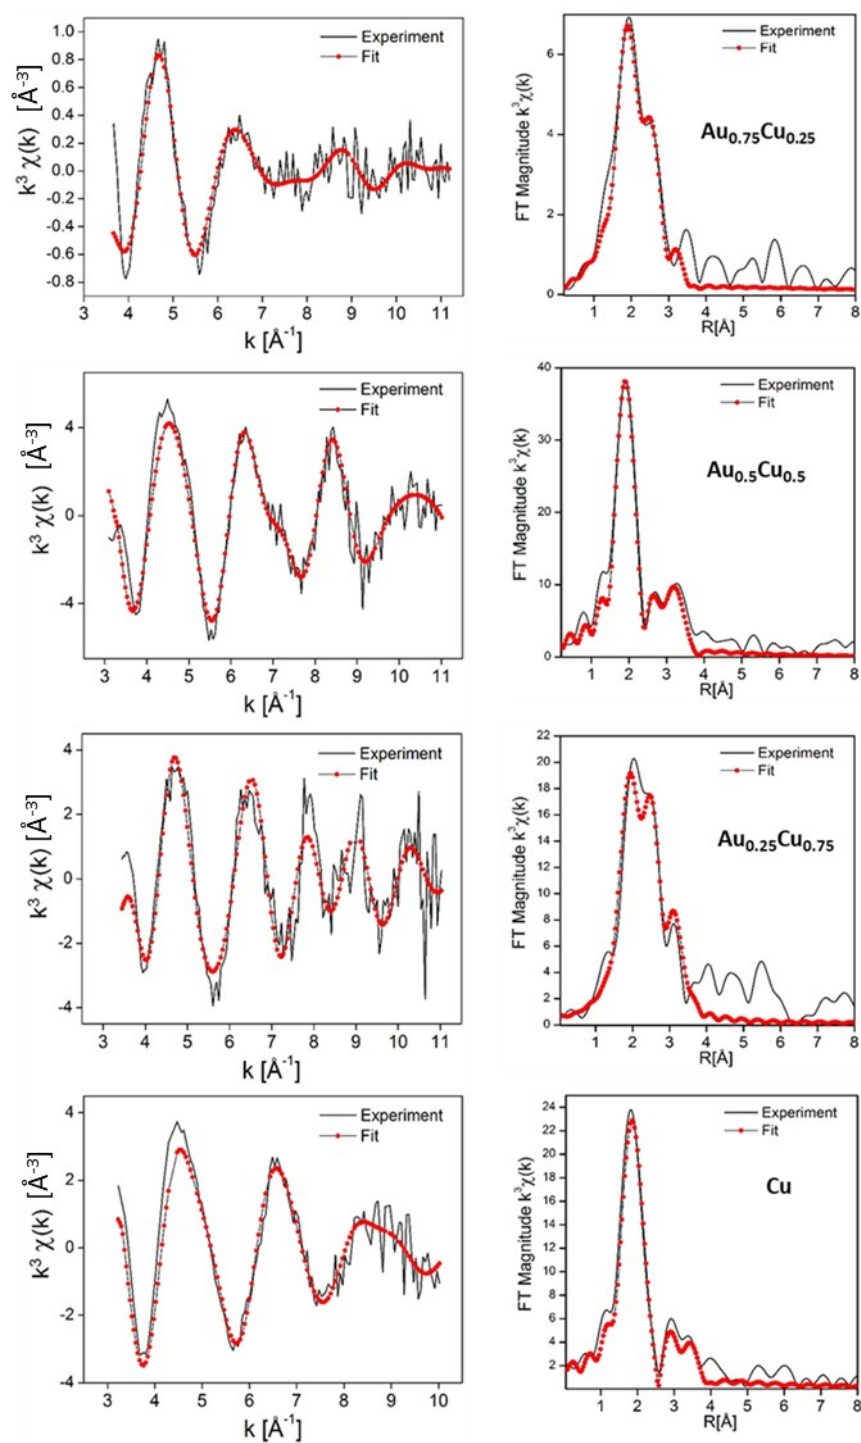

**Figure S8.** Fluorescence-detected Cu K-edge  $k^3$ -weighted EXAFS of  $\text{Au}_x\text{Cu}_{1-x}$  ( $x = 0.75, 0.5, 0.25$  and  $0$ ) (left) with the corresponding phase corrected Fourier transforms (right). Fits of the data are given by red lines.

## Possible current generated by the oxidation of copper

The order of magnitude calculation below compares the generated photocurrent with a possible current created by the oxidation of the copper in the NCs.

### 1. Conversion of measured photocurrent for Au<sub>0.25</sub>Cu<sub>0.75</sub>/TNT into electrons per minute

The current generated by Au<sub>0.25</sub>Cu<sub>0.75</sub>/TNT under light illumination and at 1.23 VRHE is 244  $\mu\text{A}/\text{cm}^2$ . This corresponds to  $9.1 \times 10^{16}$  electrons / minute /  $\text{cm}^2$ .

### 2. Maximal possible current generated by the oxidation of copper

- 0.25 (0.75) is the atomic fraction of Au (Cu) in the Au<sub>0.25</sub>Cu<sub>0.75</sub> NCs. This implies Au (Cu) makes up 51% (49%) of the mass in the NCs.
- For samples with a loading of 4 ML a total mass of 1.12  $\mu\text{g}/\text{cm}^2$  is deposited (0.062  $\mu\text{g}/\text{cm}^2$ /minute -and a deposition of 18 minutes) or 0.55  $\mu\text{g}/\text{cm}^2$  Cu or  $5.2 \times 10^{15}$  Cu atoms/  $\text{cm}^2$ .
- Considering two electrons to oxidize one Cu atom and a current density of  $9.1 \times 10^{16}$  electrons / minute /  $\text{cm}^2$ , it would take only 0.11 minutes or 7 seconds to oxidize all the copper in the for Au<sub>0.25</sub>Cu<sub>0.75</sub>/TNT.
- This time is much shorter than the PEC experiments of > 300 s, so the majority of the generated current is attributed to the oxygen evolution reaction.
